# Supplementary material for: Improved double Fourier series on a sphere and its application to a semi-implicit semi-Lagrangian shallow-water model
Source: Copernicus journal article supplement (doi:10.5194/gmd-15-2561-2022), 2022-03-28
Supplement: Supplementary file 1 [file gmd-15-2561-2022-supplement.zip]

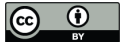

## *Supplement of*

# **Improved double Fourier series on a sphere and its application to a semi-implicit semi-Lagrangian shallow-water model**

**Hiromasa Yoshimura**

*Correspondence to:* Hiromasa Yoshimura ([hyoshimu@mri-jma.go.jp](mailto:hyoshimu@mri-jma.go.jp))

- [gmd-15-2561-2022-supplement-title-page.pdf](#)
- [Supplement\\_Yoshimura](#)
  - [DFS\\_paper\\_supplement.pdf](#)
  - [Source\\_code](#)
    - \* [LICENSE.txt](#)
    - \* [README.txt](#)
    - \* [bihar](#)
    - \* [shallow\\_water\\_DFS](#)
    - \* [shallow\\_water\\_SH](#)

The copyright of individual parts of the supplement might differ from the article licence.
