# Supplementary material for: Improved double Fourier series on a sphere and its application to a semi-implicit semi-Lagrangian shallow-water model
Source: Copernicus journal article supplement (doi:10.5194/gmd-15-2561-2022), 2022-03-28
Supplement: Supplementary file 2 [file gmd-15-2561-2022-supplement.zip]

Archive with 101 entries (96 files):
- gmd-15-2561-2022-supplement-title-page.pdf
- Supplement_Yoshimura/
- Supplement_Yoshimura/DFS_paper_supplement.pdf
- Supplement_Yoshimura/Source_code/
- Supplement_Yoshimura/Source_code/LICENSE.txt
- Supplement_Yoshimura/Source_code/shallow_water_DFS/
- Supplement_Yoshimura/Source_code/shallow_water_DFS/pentadiagonal.F90
- Supplement_Yoshimura/Source_code/shallow_water_DFS/tridiagonal.F90
- Supplement_Yoshimura/Source_code/shallow_water_DFS/pentadiagonal_cmplx.F90
- Supplement_Yoshimura/Source_code/shallow_water_DFS/uv2divrot_dfs_old.F90
- Supplement_Yoshimura/Source_code/shallow_water_DFS/yderiv_dfs_old.F90
- Supplement_Yoshimura/Source_code/shallow_water_DFS/legendre.F90
- Supplement_Yoshimura/Source_code/shallow_water_DFS/test_pentadiagonal.F90
- Supplement_Yoshimura/Source_code/shallow_water_DFS/test.sh
- Supplement_Yoshimura/Source_code/shallow_water_DFS/monit_spectrum.F90
- Supplement_Yoshimura/Source_code/shallow_water_DFS/helmholtz_dfs_cmplx.F90
- Supplement_Yoshimura/Source_code/shallow_water_DFS/test_tridiagonal.F90
- Supplement_Yoshimura/Source_code/shallow_water_DFS/prm_phconst.F90
- Supplement_Yoshimura/Source_code/shallow_water_DFS/xderiv.F90
- Supplement_Yoshimura/Source_code/shallow_water_DFS/pentadiagonal_4.F90
- Supplement_Yoshimura/Source_code/shallow_water_DFS/divrot2uv_dfs.F90
- Supplement_Yoshimura/Source_code/shallow_water_DFS/tridiagonal_cmplx.F90
- Supplement_Yoshimura/Source_code/shallow_water_DFS/divrot2uv_dfs_old.F90
- Supplement_Yoshimura/Source_code/shallow_water_DFS/test.F90
- Supplement_Yoshimura/Source_code/shallow_water_DFS/ninediagonal.F90
- Supplement_Yoshimura/Source_code/shallow_water_DFS/test_laplacian_helmholtz.F90
- Supplement_Yoshimura/Source_code/shallow_water_DFS/uv2divrot_dfs.F90
- Supplement_Yoshimura/Source_code/shallow_water_DFS/com_dfs.F90
- Supplement_Yoshimura/Source_code/shallow_water_DFS/fft_y.F90
- Supplement_Yoshimura/Source_code/shallow_water_DFS/monit_norm.F90
- Supplement_Yoshimura/Source_code/shallow_water_DFS/helmholtz_dfs.F90
- Supplement_Yoshimura/Source_code/shallow_water_DFS/helmholtz_dfs_old.F90
- Supplement_Yoshimura/Source_code/shallow_water_DFS/helmholtz_dfs_cmplx_old.F90
- Supplement_Yoshimura/Source_code/shallow_water_DFS/test_ninediagonal.F90
- Supplement_Yoshimura/Source_code/shallow_water_DFS/Makefile
- Supplement_Yoshimura/Source_code/shallow_water_DFS/sw_dfs.F90
- Supplement_Yoshimura/Source_code/shallow_water_DFS/e_time.F90
- Supplement_Yoshimura/Source_code/shallow_water_DFS/adv_dfs.F90
- Supplement_Yoshimura/Source_code/shallow_water_DFS/fft.F90
- Supplement_Yoshimura/Source_code/shallow_water_DFS/fcst_sw_dfs.sh
- Supplement_Yoshimura/Source_code/shallow_water_DFS/fcst_adv_dfs.sh
- Supplement_Yoshimura/Source_code/shallow_water_DFS/test_truncate.F90
- Supplement_Yoshimura/Source_code/shallow_water_DFS/test_laplacian_helmholtz.sh
- Supplement_Yoshimura/Source_code/shallow_water_DFS/gmean_to_zero_dfs.F90
- Supplement_Yoshimura/Source_code/shallow_water_DFS/ninediagonal_4.F90
- Supplement_Yoshimura/Source_code/shallow_water_DFS/hdiff4_dfs.F90
- Supplement_Yoshimura/Source_code/shallow_water_DFS/monit.F90
- Supplement_Yoshimura/Source_code/shallow_water_DFS/grads.F90
- Supplement_Yoshimura/Source_code/README.txt
- Supplement_Yoshimura/Source_code/shallow_water_SH/
- Supplement_Yoshimura/Source_code/shallow_water_SH/rotdiv2uv.F90
- Supplement_Yoshimura/Source_code/shallow_water_SH/sw_eul_sh.F90
- Supplement_Yoshimura/Source_code/shallow_water_SH/legendre.F90
- Supplement_Yoshimura/Source_code/shallow_water_SH/sw_sh.F90
- Supplement_Yoshimura/Source_code/shallow_water_SH/monit_spectrum.F90
- Supplement_Yoshimura/Source_code/shallow_water_SH/uv2rotdiv.F90
- Supplement_Yoshimura/Source_code/shallow_water_SH/prm_phconst.F90
- Supplement_Yoshimura/Source_code/shallow_water_SH/xderiv.F90
- Supplement_Yoshimura/Source_code/shallow_water_SH/fcst_sw_eul_sh.sh
- Supplement_Yoshimura/Source_code/shallow_water_SH/adv_sh.F90
- Supplement_Yoshimura/Source_code/shallow_water_SH/test_laplacian_helmholtz.F90
- Supplement_Yoshimura/Source_code/shallow_water_SH/fcst_adv_sh.sh
- Supplement_Yoshimura/Source_code/shallow_water_SH/monit_norm.F90
- Supplement_Yoshimura/Source_code/shallow_water_SH/Makefile
- Supplement_Yoshimura/Source_code/shallow_water_SH/e_time.F90
- Supplement_Yoshimura/Source_code/shallow_water_SH/fft.F90
- Supplement_Yoshimura/Source_code/shallow_water_SH/test_truncate.F90
- Supplement_Yoshimura/Source_code/shallow_water_SH/test_laplacian_helmholtz.sh
- Supplement_Yoshimura/Source_code/shallow_water_SH/fcst_sw_sh.sh
- Supplement_Yoshimura/Source_code/shallow_water_SH/monit.F90
- Supplement_Yoshimura/Source_code/shallow_water_SH/grads.F90
- Supplement_Yoshimura/Source_code/bihar/
- Supplement_Yoshimura/Source_code/bihar/dradb4.f
- Supplement_Yoshimura/Source_code/bihar/dcost.f
- Supplement_Yoshimura/Source_code/bihar/dsinqi.f
- Supplement_Yoshimura/Source_code/bihar/drfftf.f
- Supplement_Yoshimura/Source_code/bihar/dcsqb1.f
- Supplement_Yoshimura/Source_code/bihar/drffti.f
- Supplement_Yoshimura/Source_code/bihar/dradb5.f
- Supplement_Yoshimura/Source_code/bihar/dradf5.f
- Supplement_Yoshimura/Source_code/bihar/dradb3.f
- Supplement_Yoshimura/Source_code/bihar/drfti1.f
- Supplement_Yoshimura/Source_code/bihar/dsinqf.f
- Supplement_Yoshimura/Source_code/bihar/dradf3.f
- Supplement_Yoshimura/Source_code/bihar/dsint.f
- Supplement_Yoshimura/Source_code/bihar/dcosqi.f
- Supplement_Yoshimura/Source_code/bihar/dradf4.f
- Supplement_Yoshimura/Source_code/bihar/dradf2.f
- Supplement_Yoshimura/Source_code/bihar/dradfg.f
- Supplement_Yoshimura/Source_code/bihar/dsinti.f
- Supplement_Yoshimura/Source_code/bihar/dradbg.f
- Supplement_Yoshimura/Source_code/bihar/dcosti.f
- Supplement_Yoshimura/Source_code/bihar/dcsqf1.f
- Supplement_Yoshimura/Source_code/bihar/drftb1.f
- Supplement_Yoshimura/Source_code/bihar/drfftb.f
- Supplement_Yoshimura/Source_code/bihar/dcosqf.f
- Supplement_Yoshimura/Source_code/bihar/Makefile
- Supplement_Yoshimura/Source_code/bihar/drftf1.f
- Supplement_Yoshimura/Source_code/bihar/dsinqb.f
- Supplement_Yoshimura/Source_code/bihar/dcosqb.f
- Supplement_Yoshimura/Source_code/bihar/dradb2.f
