# Supplementary material for: Improved double Fourier series on a sphere and its application to a semi-implicit semi-Lagrangian shallow-water model
Source: Copernicus journal article supplement (doi:10.5194/gmd-15-2561-2022), 2022-03-28
Supplement: Supplementary file 2 [file gmd-15-2561-2022-supplement.zip › Supplement_Yoshimura/Source_code/bihar/dcosqb.f]

      subroutine dcosqb (n,x,wsave)
      double precision x(1), wsave(1), tsqrt2, x1
      data tsqrt2 /  2.828427124 7461900976 0337744841 94 d0 /
c
      if (n-2) 101,102,103
  101 x(1) = 4.d0*x(1)
      return
c
  102 x1 = 4.d0*(x(1)+x(2))
      x(2) = tsqrt2*(x(1)-x(2))
      x(1) = x1
      return
c
  103 call dcsqb1 (n,x,wsave,wsave(n+1))
c
      return
      end
