# Supplementary material for: Improved double Fourier series on a sphere and its application to a semi-implicit semi-Lagrangian shallow-water model
Source: Copernicus journal article supplement (doi:10.5194/gmd-15-2561-2022), 2022-03-28
Supplement: Supplementary file 2 [file gmd-15-2561-2022-supplement.zip › Supplement_Yoshimura/Source_code/bihar/dcosqf.f]

      subroutine dcosqf (n,x,wsave)
      double precision x(1), wsave(1), sqrt2, tsqx
      data sqrt2 /  1.414213562 3730950488 0168872420 970 d0 /
c
      if (n-2) 102,101,103
  101 tsqx = sqrt2*x(2)
      x(2) = x(1)-tsqx
      x(1) = x(1)+tsqx
  102 return
c
  103 call dcsqf1 (n,x,wsave,wsave(n+1))
c
      return
      end
