# Supplementary material for: Improved double Fourier series on a sphere and its application to a semi-implicit semi-Lagrangian shallow-water model
Source: Copernicus journal article supplement (doi:10.5194/gmd-15-2561-2022), 2022-03-28
Supplement: Supplementary file 2 [file gmd-15-2561-2022-supplement.zip › Supplement_Yoshimura/Source_code/bihar/dcosqi.f]

      subroutine dcosqi (n,wsave)
      double precision wsave(1), dt, fk, pih
      data pih /  1.570796326 7948966192 3132169163 975 d0 /
c
      dt = pih/dfloat(n)
      fk = 0.d0
      do 101 k=1,n
         fk = fk+1.d0
         wsave(k) = dcos(fk*dt)
  101 continue
c
      call drffti (n,wsave(n+1))
c
      return
      end
