# Supplementary material for: Improved double Fourier series on a sphere and its application to a semi-implicit semi-Lagrangian shallow-water model
Source: Copernicus journal article supplement (doi:10.5194/gmd-15-2561-2022), 2022-03-28
Supplement: Supplementary file 2 [file gmd-15-2561-2022-supplement.zip › Supplement_Yoshimura/Source_code/bihar/dcost.f]

      subroutine dcost (n,x,wsave)
      double precision x(1), wsave(1), c1, t1, t2, tx2, x1h, x1p3, xi,
     1  xim2
c
      nm1 = n-1
      np1 = n+1
      ns2 = n/2
      if (n-2) 106,101,102
  101 x1h = x(1)+x(2)
      x(2) = x(1)-x(2)
      x(1) = x1h
      return
c
  102 if (n .gt. 3) go to 103
      x1p3 = x(1)+x(3)
      tx2 = x(2)+x(2)
      x(2) = x(1)-x(3)
      x(1) = x1p3+tx2
      x(3) = x1p3-tx2
      return
c
  103 c1 = x(1)-x(n)
      x(1) = x(1)+x(n)
      do 104 k=2,ns2
         kc = np1-k
         t1 = x(k)+x(kc)
         t2 = x(k)-x(kc)
         c1 = c1+wsave(kc)*t2
         t2 = wsave(k)*t2
         x(k) = t1-t2
         x(kc) = t1+t2
  104 continue
      modn = mod(n,2)
      if (modn .ne. 0) x(ns2+1) = x(ns2+1)+x(ns2+1)
c
      call drfftf (nm1,x,wsave(n+1))
c
      xim2 = x(2)
      x(2) = c1
      do 105 i=4,n,2
         xi = x(i)
         x(i) = x(i-2)-x(i-1)
         x(i-1) = xim2
         xim2 = xi
  105 continue
      if (modn .ne. 0) x(n) = xim2
c
  106 return
      end
