# Supplementary material for: Improved double Fourier series on a sphere and its application to a semi-implicit semi-Lagrangian shallow-water model
Source: Copernicus journal article supplement (doi:10.5194/gmd-15-2561-2022), 2022-03-28
Supplement: Supplementary file 2 [file gmd-15-2561-2022-supplement.zip › Supplement_Yoshimura/Source_code/bihar/dcosti.f]

      subroutine dcosti (n,wsave)
      double precision wsave(1), dt, fk, pi
      data pi /  3.141592653 5897932384 6264338327 950 d0 /
c
      if (n .le. 3) return
c
      nm1 = n-1
      np1 = n+1
      ns2 = n/2
      dt = pi/dfloat(nm1)
      fk = 0.d0
      do 101 k=2,ns2
         kc = np1-k
         fk = fk+1.d0
         wsave(k) = 2.d0*dsin(fk*dt)
         wsave(kc) = 2.d0*dcos(fk*dt)
  101 continue
c
      call drffti (nm1,wsave(n+1))
c
      return
      end
