# Supplementary material for: Improved double Fourier series on a sphere and its application to a semi-implicit semi-Lagrangian shallow-water model
Source: Copernicus journal article supplement (doi:10.5194/gmd-15-2561-2022), 2022-03-28
Supplement: Supplementary file 2 [file gmd-15-2561-2022-supplement.zip › Supplement_Yoshimura/Source_code/bihar/dcsqf1.f]

      subroutine dcsqf1 (n,x,w,xh)
      double precision x(1), w(1), xh(1), xim1
c
      ns2 = (n+1)/2
      np2 = n+2
      do 101 k=2,ns2
         kc = np2-k
         xh(k) = x(k)+x(kc)
         xh(kc) = x(k)-x(kc)
  101 continue
      modn = mod(n,2)
      if (modn .eq. 0) xh(ns2+1) = x(ns2+1)+x(ns2+1)
c
      do 102 k=2,ns2
         kc = np2-k
         x(k) = w(k-1)*xh(kc)+w(kc-1)*xh(k)
         x(kc) = w(k-1)*xh(k)-w(kc-1)*xh(kc)
  102 continue
      if (modn .eq. 0) x(ns2+1) = w(ns2)*xh(ns2+1)
c
      call drfftf (n,x,xh)
c
      do 103 i=3,n,2
         xim1 = x(i-1)-x(i)
         x(i) = x(i-1)+x(i)
         x(i-1) = xim1
  103 continue
c
      return
      end
