# Supplementary material for: Improved double Fourier series on a sphere and its application to a semi-implicit semi-Lagrangian shallow-water model
Source: Copernicus journal article supplement (doi:10.5194/gmd-15-2561-2022), 2022-03-28
Supplement: Supplementary file 2 [file gmd-15-2561-2022-supplement.zip › Supplement_Yoshimura/Source_code/bihar/dradb3.f]

      subroutine dradb3 (ido,l1,cc,ch,wa1,wa2)
      double precision cc(ido,3,l1), ch(ido,l1,3), wa1(1), wa2(1),
     1  ci2, ci3, cr2, cr3, di2, di3, dr2, dr3, taui, taur, ti2, tr2
      data taur / -0.5 d0 /
      data taui  /  0.8660254037 8443864676 3723170752 93618d0/
c
      do 101 k=1,l1
         tr2 = cc(ido,2,k)+cc(ido,2,k)
         cr2 = cc(1,1,k)+taur*tr2
         ch(1,k,1) = cc(1,1,k)+tr2
         ci3 = taui*(cc(1,3,k)+cc(1,3,k))
         ch(1,k,2) = cr2-ci3
         ch(1,k,3) = cr2+ci3
  101 continue
c
      if (ido .eq. 1) return
      idp2 = ido+2
      do 103 k=1,l1
         do 102 i=3,ido,2
            ic = idp2-i
            tr2 = cc(i-1,3,k)+cc(ic-1,2,k)
            cr2 = cc(i-1,1,k)+taur*tr2
            ch(i-1,k,1) = cc(i-1,1,k)+tr2
            ti2 = cc(i,3,k)-cc(ic,2,k)
            ci2 = cc(i,1,k)+taur*ti2
            ch(i,k,1) = cc(i,1,k)+ti2
            cr3 = taui*(cc(i-1,3,k)-cc(ic-1,2,k))
            ci3 = taui*(cc(i,3,k)+cc(ic,2,k))
            dr2 = cr2-ci3
            dr3 = cr2+ci3
            di2 = ci2+cr3
            di3 = ci2-cr3
            ch(i-1,k,2) = wa1(i-2)*dr2-wa1(i-1)*di2
            ch(i,k,2) = wa1(i-2)*di2+wa1(i-1)*dr2
            ch(i-1,k,3) = wa2(i-2)*dr3-wa2(i-1)*di3
            ch(i,k,3) = wa2(i-2)*di3+wa2(i-1)*dr3
  102    continue
  103 continue
c
      return
      end
