# Supplementary material for: Improved double Fourier series on a sphere and its application to a semi-implicit semi-Lagrangian shallow-water model
Source: Copernicus journal article supplement (doi:10.5194/gmd-15-2561-2022), 2022-03-28
Supplement: Supplementary file 2 [file gmd-15-2561-2022-supplement.zip › Supplement_Yoshimura/Source_code/bihar/dradb5.f]

      subroutine dradb5 (ido,l1,cc,ch,wa1,wa2,wa3,wa4)
      double precision cc(ido,5,l1), ch(ido,l1,5), wa1(1), wa2(1),
     1  wa3(1), wa4(1), ci2, ci3, ci4, ci5, cr2, cr3, cr4, cr5,
     2  di2, di3, di4, di5, dr2, dr3, dr4, dr5, ti11, ti12, ti2, ti3,
     3  ti4, ti5, tr11, tr12, tr2, tr3, tr4, tr5
      data tr11  /  0.3090169943 7494742410 2293417182 81906d0/
      data ti11  /  0.9510565162 9515357211 6439333379 38214d0/
      data tr12  / -0.8090169943 7494742410 2293417182 81906d0/
      data ti12  /  0.5877852522 9247312916 8705954639 07277d0/
c
      do 101 k=1,l1
         ti5 = cc(1,3,k)+cc(1,3,k)
         ti4 = cc(1,5,k)+cc(1,5,k)
         tr2 = cc(ido,2,k)+cc(ido,2,k)
         tr3 = cc(ido,4,k)+cc(ido,4,k)
         ch(1,k,1) = cc(1,1,k)+tr2+tr3
         cr2 = cc(1,1,k)+tr11*tr2+tr12*tr3
         cr3 = cc(1,1,k)+tr12*tr2+tr11*tr3
         ci5 = ti11*ti5+ti12*ti4
         ci4 = ti12*ti5-ti11*ti4
         ch(1,k,2) = cr2-ci5
         ch(1,k,3) = cr3-ci4
         ch(1,k,4) = cr3+ci4
         ch(1,k,5) = cr2+ci5
  101 continue
      if (ido .eq. 1) return
c
      idp2 = ido+2
      do 103 k=1,l1
         do 102 i=3,ido,2
            ic = idp2-i
            ti5 = cc(i,3,k)+cc(ic,2,k)
            ti2 = cc(i,3,k)-cc(ic,2,k)
            ti4 = cc(i,5,k)+cc(ic,4,k)
            ti3 = cc(i,5,k)-cc(ic,4,k)
            tr5 = cc(i-1,3,k)-cc(ic-1,2,k)
            tr2 = cc(i-1,3,k)+cc(ic-1,2,k)
            tr4 = cc(i-1,5,k)-cc(ic-1,4,k)
            tr3 = cc(i-1,5,k)+cc(ic-1,4,k)
            ch(i-1,k,1) = cc(i-1,1,k)+tr2+tr3
            ch(i,k,1) = cc(i,1,k)+ti2+ti3
            cr2 = cc(i-1,1,k)+tr11*tr2+tr12*tr3
            ci2 = cc(i,1,k)+tr11*ti2+tr12*ti3
            cr3 = cc(i-1,1,k)+tr12*tr2+tr11*tr3
            ci3 = cc(i,1,k)+tr12*ti2+tr11*ti3
            cr5 = ti11*tr5+ti12*tr4
            ci5 = ti11*ti5+ti12*ti4
            cr4 = ti12*tr5-ti11*tr4
            ci4 = ti12*ti5-ti11*ti4
            dr3 = cr3-ci4
            dr4 = cr3+ci4
            di3 = ci3+cr4
            di4 = ci3-cr4
            dr5 = cr2+ci5
            dr2 = cr2-ci5
            di5 = ci2-cr5
            di2 = ci2+cr5
            ch(i-1,k,2) = wa1(i-2)*dr2-wa1(i-1)*di2
            ch(i,k,2) = wa1(i-2)*di2+wa1(i-1)*dr2
            ch(i-1,k,3) = wa2(i-2)*dr3-wa2(i-1)*di3
            ch(i,k,3) = wa2(i-2)*di3+wa2(i-1)*dr3
            ch(i-1,k,4) = wa3(i-2)*dr4-wa3(i-1)*di4
            ch(i,k,4) = wa3(i-2)*di4+wa3(i-1)*dr4
            ch(i-1,k,5) = wa4(i-2)*dr5-wa4(i-1)*di5
            ch(i,k,5) = wa4(i-2)*di5+wa4(i-1)*dr5
  102    continue
  103 continue
c
      return
      end
