# Supplementary material for: Improved double Fourier series on a sphere and its application to a semi-implicit semi-Lagrangian shallow-water model
Source: Copernicus journal article supplement (doi:10.5194/gmd-15-2561-2022), 2022-03-28
Supplement: Supplementary file 2 [file gmd-15-2561-2022-supplement.zip › Supplement_Yoshimura/Source_code/bihar/dradbg.f]

      subroutine dradbg (ido,ip,l1,idl1,cc,c1,c2,ch,ch2,wa)
      double precision cc(ido,ip,l1), c1(ido,l1,ip), c2(idl1,ip),
     1  ch(ido,l1,ip), ch2(idl1,ip), wa(1), ai1, ai2, ar1, ar1h, ar2,
     2  ar2h, arg, dc2, dcp, ds2, dsp, tpi
      data tpi   /  6.2831853071 7958647692 5286766559 00577d0/
c
      arg = tpi/dfloat(ip)
      dcp = dcos(arg)
      dsp = dsin(arg)
      idp2 = ido+2
      nbd = (ido-1)/2
      ipp2 = ip+2
      ipph = (ip+1)/2
      if (ido .lt. l1) go to 103
      do 102 k=1,l1
         do 101 i=1,ido
            ch(i,k,1) = cc(i,1,k)
  101    continue
  102 continue
      go to 106
c
  103 do 105 i=1,ido
         do 104 k=1,l1
            ch(i,k,1) = cc(i,1,k)
  104    continue
  105 continue
c
  106 do 108 j=2,ipph
         jc = ipp2-j
         j2 = j+j
         do 107 k=1,l1
            ch(1,k,j) = cc(ido,j2-2,k)+cc(ido,j2-2,k)
            ch(1,k,jc) = cc(1,j2-1,k)+cc(1,j2-1,k)
  107    continue
  108 continue
c
      if (ido .eq. 1) go to 116
      if (nbd .lt. l1) go to 112
      do 111 j=2,ipph
         jc = ipp2-j
         do 110 k=1,l1
            do 109 i=3,ido,2
               ic = idp2-i
               ch(i-1,k,j) = cc(i-1,2*j-1,k)+cc(ic-1,2*j-2,k)
               ch(i-1,k,jc) = cc(i-1,2*j-1,k)-cc(ic-1,2*j-2,k)
               ch(i,k,j) = cc(i,2*j-1,k)-cc(ic,2*j-2,k)
               ch(i,k,jc) = cc(i,2*j-1,k)+cc(ic,2*j-2,k)
  109       continue
  110    continue
  111 continue
      go to 116
c
  112 do 115 j=2,ipph
         jc = ipp2-j
         do 114 i=3,ido,2
            ic = idp2-i
            do 113 k=1,l1
               ch(i-1,k,j) = cc(i-1,2*j-1,k)+cc(ic-1,2*j-2,k)
               ch(i-1,k,jc) = cc(i-1,2*j-1,k)-cc(ic-1,2*j-2,k)
               ch(i,k,j) = cc(i,2*j-1,k)-cc(ic,2*j-2,k)
               ch(i,k,jc) = cc(i,2*j-1,k)+cc(ic,2*j-2,k)
  113       continue
  114    continue
  115 continue
c
  116 ar1 = 1.
      ai1 = 0.
      do 120 l=2,ipph
         lc = ipp2-l
         ar1h = dcp*ar1-dsp*ai1
         ai1 = dcp*ai1+dsp*ar1
         ar1 = ar1h
         do 117 ik=1,idl1
            c2(ik,l) = ch2(ik,1)+ar1*ch2(ik,2)
            c2(ik,lc) = ai1*ch2(ik,ip)
  117    continue
         dc2 = ar1
         ds2 = ai1
         ar2 = ar1
         ai2 = ai1
         do 119 j=3,ipph
            jc = ipp2-j
            ar2h = dc2*ar2-ds2*ai2
            ai2 = dc2*ai2+ds2*ar2
            ar2 = ar2h
            do 118 ik=1,idl1
               c2(ik,l) = c2(ik,l)+ar2*ch2(ik,j)
               c2(ik,lc) = c2(ik,lc)+ai2*ch2(ik,jc)
  118       continue
  119    continue
  120 continue
c
      do 122 j=2,ipph
         do 121 ik=1,idl1
            ch2(ik,1) = ch2(ik,1)+ch2(ik,j)
  121    continue
  122 continue
c
      do 124 j=2,ipph
         jc = ipp2-j
         do 123 k=1,l1
            ch(1,k,j) = c1(1,k,j)-c1(1,k,jc)
            ch(1,k,jc) = c1(1,k,j)+c1(1,k,jc)
  123    continue
  124 continue
c
      if (ido .eq. 1) go to 132
      if (nbd .lt. l1) go to 128
      do 127 j=2,ipph
         jc = ipp2-j
         do 126 k=1,l1
            do 125 i=3,ido,2
               ch(i-1,k,j) = c1(i-1,k,j)-c1(i,k,jc)
               ch(i-1,k,jc) = c1(i-1,k,j)+c1(i,k,jc)
               ch(i,k,j) = c1(i,k,j)+c1(i-1,k,jc)
               ch(i,k,jc) = c1(i,k,j)-c1(i-1,k,jc)
  125       continue
  126    continue
  127 continue
      go to 132
c
  128 do 131 j=2,ipph
         jc = ipp2-j
         do 130 i=3,ido,2
            do 129 k=1,l1
               ch(i-1,k,j) = c1(i-1,k,j)-c1(i,k,jc)
               ch(i-1,k,jc) = c1(i-1,k,j)+c1(i,k,jc)
               ch(i,k,j) = c1(i,k,j)+c1(i-1,k,jc)
               ch(i,k,jc) = c1(i,k,j)-c1(i-1,k,jc)
  129       continue
  130    continue
  131 continue
  132 continue
c
      if (ido .eq. 1) return
      do 133 ik=1,idl1
         c2(ik,1) = ch2(ik,1)
  133 continue
c
      do 135 j=2,ip
         do 134 k=1,l1
            c1(1,k,j) = ch(1,k,j)
  134    continue
  135 continue
c
      if (nbd .gt. l1) go to 139
      is = -ido
      do 138 j=2,ip
         is = is+ido
         idij = is
         do 137 i=3,ido,2
            idij = idij+2
            do 136 k=1,l1
               c1(i-1,k,j) = wa(idij-1)*ch(i-1,k,j)-wa(idij)*ch(i,k,j)
               c1(i,k,j) = wa(idij-1)*ch(i,k,j)+wa(idij)*ch(i-1,k,j)
  136       continue
  137    continue
  138 continue
      go to 143
c
  139 is = -ido
      do 142 j=2,ip
         is = is+ido
         do 141 k=1,l1
            idij = is
            do 140 i=3,ido,2
               idij = idij+2
               c1(i-1,k,j) = wa(idij-1)*ch(i-1,k,j)-wa(idij)*ch(i,k,j)
               c1(i,k,j) = wa(idij-1)*ch(i,k,j)+wa(idij)*ch(i-1,k,j)
  140       continue
  141    continue
  142 continue
c
  143 return
      end
