# Supplementary material for: Improved double Fourier series on a sphere and its application to a semi-implicit semi-Lagrangian shallow-water model
Source: Copernicus journal article supplement (doi:10.5194/gmd-15-2561-2022), 2022-03-28
Supplement: Supplementary file 2 [file gmd-15-2561-2022-supplement.zip › Supplement_Yoshimura/Source_code/bihar/dradf5.f]

      subroutine dradf5 (ido,l1,cc,ch,wa1,wa2,wa3,wa4)
      double precision cc(ido,l1,5), ch(ido,5,l1), wa1(1), wa2(1),
     1  wa3(1), wa4(1), ci2, ci3, ci4, ci5, cr2, cr3, cr4, cr5, di2,
     2  di3, di4, di5, dr2, dr3, dr4, dr5, ti11, ti12, ti2, ti3, ti4,
     3  ti5, tr11, tr12, tr2, tr3, tr4, tr5
      data tr11  /  0.3090169943 7494742410 2293417182 81906d0/
      data ti11  /  0.9510565162 9515357211 6439333379 38214d0/
      data tr12  / -0.8090169943 7494742410 2293417182 81906d0/
      data ti12  /  0.5877852522 9247312916 8705954639 07277d0/
c
      do 101 k=1,l1
         cr2 = cc(1,k,5)+cc(1,k,2)
         ci5 = cc(1,k,5)-cc(1,k,2)
         cr3 = cc(1,k,4)+cc(1,k,3)
         ci4 = cc(1,k,4)-cc(1,k,3)
         ch(1,1,k) = cc(1,k,1)+cr2+cr3
         ch(ido,2,k) = cc(1,k,1)+tr11*cr2+tr12*cr3
         ch(1,3,k) = ti11*ci5+ti12*ci4
         ch(ido,4,k) = cc(1,k,1)+tr12*cr2+tr11*cr3
         ch(1,5,k) = ti12*ci5-ti11*ci4
  101 continue
c
      if (ido .eq. 1) return
      idp2 = ido+2
      do 103 k=1,l1
         do 102 i=3,ido,2
            ic = idp2-i
            dr2 = wa1(i-2)*cc(i-1,k,2)+wa1(i-1)*cc(i,k,2)
            di2 = wa1(i-2)*cc(i,k,2)-wa1(i-1)*cc(i-1,k,2)
            dr3 = wa2(i-2)*cc(i-1,k,3)+wa2(i-1)*cc(i,k,3)
            di3 = wa2(i-2)*cc(i,k,3)-wa2(i-1)*cc(i-1,k,3)
            dr4 = wa3(i-2)*cc(i-1,k,4)+wa3(i-1)*cc(i,k,4)
            di4 = wa3(i-2)*cc(i,k,4)-wa3(i-1)*cc(i-1,k,4)
            dr5 = wa4(i-2)*cc(i-1,k,5)+wa4(i-1)*cc(i,k,5)
            di5 = wa4(i-2)*cc(i,k,5)-wa4(i-1)*cc(i-1,k,5)
            cr2 = dr2+dr5
            ci5 = dr5-dr2
            cr5 = di2-di5
            ci2 = di2+di5
            cr3 = dr3+dr4
            ci4 = dr4-dr3
            cr4 = di3-di4
            ci3 = di3+di4
            ch(i-1,1,k) = cc(i-1,k,1)+cr2+cr3
            ch(i,1,k) = cc(i,k,1)+ci2+ci3
            tr2 = cc(i-1,k,1)+tr11*cr2+tr12*cr3
            ti2 = cc(i,k,1)+tr11*ci2+tr12*ci3
            tr3 = cc(i-1,k,1)+tr12*cr2+tr11*cr3
            ti3 = cc(i,k,1)+tr12*ci2+tr11*ci3
            tr5 = ti11*cr5+ti12*cr4
            ti5 = ti11*ci5+ti12*ci4
            tr4 = ti12*cr5-ti11*cr4
            ti4 = ti12*ci5-ti11*ci4
            ch(i-1,3,k) = tr2+tr5
            ch(ic-1,2,k) = tr2-tr5
            ch(i,3,k) = ti2+ti5
            ch(ic,2,k) = ti5-ti2
            ch(i-1,5,k) = tr3+tr4
            ch(ic-1,4,k) = tr3-tr4
            ch(i,5,k) = ti3+ti4
            ch(ic,4,k) = ti4-ti3
  102    continue
  103 continue
c
      return
      end
