# Supplementary material for: Improved double Fourier series on a sphere and its application to a semi-implicit semi-Lagrangian shallow-water model
Source: Copernicus journal article supplement (doi:10.5194/gmd-15-2561-2022), 2022-03-28
Supplement: Supplementary file 2 [file gmd-15-2561-2022-supplement.zip › Supplement_Yoshimura/Source_code/bihar/dradfg.f]

      subroutine dradfg (ido,ip,l1,idl1,cc,c1,c2,ch,ch2,wa)
      double precision cc(ido,ip,l1), c1(ido,l1,ip), c2(idl1,ip),
     1  ch(ido,l1,ip), ch2(idl1,ip), wa(1), ai1, ai2, ar1, ar1h, ar2,
     2  ar2h, arg, dc2, dcp, ds2, dsp, tpi
      data tpi   /  6.2831853071 7958647692 5286766559 00577d0/
c
      arg = tpi/dfloat(ip)
      dcp = dcos(arg)
      dsp = dsin(arg)
      ipph = (ip+1)/2
      ipp2 = ip+2
      idp2 = ido+2
      nbd = (ido-1)/2
      if (ido .eq. 1) go to 119
      do 101 ik=1,idl1
         ch2(ik,1) = c2(ik,1)
  101 continue
      do 103 j=2,ip
         do 102 k=1,l1
            ch(1,k,j) = c1(1,k,j)
  102    continue
  103 continue
c
      if (nbd .gt. l1) go to 107
      is = -ido
      do 106 j=2,ip
         is = is+ido
         idij = is
         do 105 i=3,ido,2
            idij = idij+2
            do 104 k=1,l1
               ch(i-1,k,j) = wa(idij-1)*c1(i-1,k,j)+wa(idij)*c1(i,k,j)
               ch(i,k,j) = wa(idij-1)*c1(i,k,j)-wa(idij)*c1(i-1,k,j)
  104       continue
  105    continue
  106 continue
      go to 111
c
  107 is = -ido
      do 110 j=2,ip
         is = is+ido
         do 109 k=1,l1
            idij = is
            do 108 i=3,ido,2
               idij = idij+2
               ch(i-1,k,j) = wa(idij-1)*c1(i-1,k,j)+wa(idij)*c1(i,k,j)
               ch(i,k,j) = wa(idij-1)*c1(i,k,j)-wa(idij)*c1(i-1,k,j)
  108       continue
  109    continue
  110 continue
c
  111 if (nbd .lt. l1) go to 115
      do 114 j=2,ipph
         jc = ipp2-j
         do 113 k=1,l1
            do 112 i=3,ido,2
               c1(i-1,k,j) = ch(i-1,k,j)+ch(i-1,k,jc)
               c1(i-1,k,jc) = ch(i,k,j)-ch(i,k,jc)
               c1(i,k,j) = ch(i,k,j)+ch(i,k,jc)
               c1(i,k,jc) = ch(i-1,k,jc)-ch(i-1,k,j)
  112       continue
  113    continue
  114 continue
      go to 121
c
  115 do 118 j=2,ipph
         jc = ipp2-j
         do 117 i=3,ido,2
            do 116 k=1,l1
               c1(i-1,k,j) = ch(i-1,k,j)+ch(i-1,k,jc)
               c1(i-1,k,jc) = ch(i,k,j)-ch(i,k,jc)
               c1(i,k,j) = ch(i,k,j)+ch(i,k,jc)
               c1(i,k,jc) = ch(i-1,k,jc)-ch(i-1,k,j)
  116       continue
  117    continue
  118 continue
      go to 121
c
  119 do 120 ik=1,idl1
         c2(ik,1) = ch2(ik,1)
  120 continue
c
  121 do 123 j=2,ipph
         jc = ipp2-j
         do 122 k=1,l1
            c1(1,k,j) = ch(1,k,j)+ch(1,k,jc)
            c1(1,k,jc) = ch(1,k,jc)-ch(1,k,j)
  122    continue
  123 continue
c
      ar1 = 1.d0
      ai1 = 0.d0
      do 127 l=2,ipph
         lc = ipp2-l
         ar1h = dcp*ar1-dsp*ai1
         ai1 = dcp*ai1+dsp*ar1
         ar1 = ar1h
         do 124 ik=1,idl1
            ch2(ik,l) = c2(ik,1)+ar1*c2(ik,2)
            ch2(ik,lc) = ai1*c2(ik,ip)
  124    continue
         dc2 = ar1
         ds2 = ai1
         ar2 = ar1
         ai2 = ai1
         do 126 j=3,ipph
            jc = ipp2-j
            ar2h = dc2*ar2-ds2*ai2
            ai2 = dc2*ai2+ds2*ar2
            ar2 = ar2h
            do 125 ik=1,idl1
               ch2(ik,l) = ch2(ik,l)+ar2*c2(ik,j)
               ch2(ik,lc) = ch2(ik,lc)+ai2*c2(ik,jc)
  125       continue
  126    continue
  127 continue
c
      do 129 j=2,ipph
         do 128 ik=1,idl1
            ch2(ik,1) = ch2(ik,1)+c2(ik,j)
  128    continue
  129 continue
c
      if (ido .lt. l1) go to 132
      do 131 k=1,l1
         do 130 i=1,ido
            cc(i,1,k) = ch(i,k,1)
  130    continue
  131 continue
      go to 135
c
  132 do 134 i=1,ido
         do 133 k=1,l1
            cc(i,1,k) = ch(i,k,1)
  133    continue
  134 continue
c
  135 do 137 j=2,ipph
         jc = ipp2-j
         j2 = j+j
         do 136 k=1,l1
            cc(ido,j2-2,k) = ch(1,k,j)
            cc(1,j2-1,k) = ch(1,k,jc)
  136    continue
  137 continue
c
      if (ido .eq. 1) return
      if (nbd .lt. l1) go to 141
      do 140 j=2,ipph
         jc = ipp2-j
         j2 = j+j
         do 139 k=1,l1
            do 138 i=3,ido,2
               ic = idp2-i
               cc(i-1,j2-1,k) = ch(i-1,k,j)+ch(i-1,k,jc)
               cc(ic-1,j2-2,k) = ch(i-1,k,j)-ch(i-1,k,jc)
               cc(i,j2-1,k) = ch(i,k,j)+ch(i,k,jc)
               cc(ic,j2-2,k) = ch(i,k,jc)-ch(i,k,j)
  138       continue
  139    continue
  140 continue
      return
c
  141 do 144 j=2,ipph
         jc = ipp2-j
         j2 = j+j
         do 143 i=3,ido,2
            ic = idp2-i
            do 142 k=1,l1
               cc(i-1,j2-1,k) = ch(i-1,k,j)+ch(i-1,k,jc)
               cc(ic-1,j2-2,k) = ch(i-1,k,j)-ch(i-1,k,jc)
               cc(i,j2-1,k) = ch(i,k,j)+ch(i,k,jc)
               cc(ic,j2-2,k) = ch(i,k,jc)-ch(i,k,j)
  142       continue
  143    continue
  144 continue
c
      return
      end
