# Supplementary material for: Improved double Fourier series on a sphere and its application to a semi-implicit semi-Lagrangian shallow-water model
Source: Copernicus journal article supplement (doi:10.5194/gmd-15-2561-2022), 2022-03-28
Supplement: Supplementary file 2 [file gmd-15-2561-2022-supplement.zip › Supplement_Yoshimura/Source_code/bihar/drfftb.f]

      subroutine drfftb (n,r,wsave)
      double precision r(1), wsave(1)
c
      if (n .eq. 1) return
c
      call drftb1 (n,r,wsave,wsave(n+1),wsave(2*n+1))
c
      return
      end
