# Supplementary material for: Improved double Fourier series on a sphere and its application to a semi-implicit semi-Lagrangian shallow-water model
Source: Copernicus journal article supplement (doi:10.5194/gmd-15-2561-2022), 2022-03-28
Supplement: Supplementary file 2 [file gmd-15-2561-2022-supplement.zip › Supplement_Yoshimura/Source_code/bihar/drftb1.f]

      subroutine drftb1 (n,c,ch,wa,ifac)
      double precision c(1), ch(1), wa(1)
      integer ifac(1)
c
      nf = ifac(2)
      na = 0
      l1 = 1
      iw = 1
      do 116 k1=1,nf
         ip = ifac(k1+2)
         l2 = ip*l1
         ido = n/l2
         idl1 = ido*l1
         if (ip .ne. 4) go to 103
         ix2 = iw+ido
         ix3 = ix2+ido
         if (na .ne. 0) go to 101
         call dradb4 (ido,l1,c,ch,wa(iw),wa(ix2),wa(ix3))
         go to 102
  101    call dradb4 (ido,l1,ch,c,wa(iw),wa(ix2),wa(ix3))
  102    na = 1-na
         go to 115
c
  103    if (ip .ne. 2) go to 106
         if (na .ne. 0) go to 104
         call dradb2 (ido,l1,c,ch,wa(iw))
         go to 105
  104    call dradb2 (ido,l1,ch,c,wa(iw))
  105    na = 1-na
         go to 115
c
  106    if (ip .ne. 3) go to 109
         ix2 = iw+ido
         if (na .ne. 0) go to 107
         call dradb3 (ido,l1,c,ch,wa(iw),wa(ix2))
         go to 108
  107    call dradb3 (ido,l1,ch,c,wa(iw),wa(ix2))
  108    na = 1-na
         go to 115
c
  109    if (ip .ne. 5) go to 112
         ix2 = iw+ido
         ix3 = ix2+ido
         ix4 = ix3+ido
         if (na .ne. 0) go to 110
         call dradb5 (ido,l1,c,ch,wa(iw),wa(ix2),wa(ix3),wa(ix4))
         go to 111
  110    call dradb5 (ido,l1,ch,c,wa(iw),wa(ix2),wa(ix3),wa(ix4))
  111    na = 1-na
         go to 115
c
  112    if (na .ne. 0) go to 113
         call dradbg (ido,ip,l1,idl1,c,c,c,ch,ch,wa(iw))
         go to 114
  113    call dradbg (ido,ip,l1,idl1,ch,ch,ch,c,c,wa(iw))
  114    if (ido .eq. 1) na = 1-na
  115    l1 = l2
         iw = iw+(ip-1)*ido
  116 continue
c
      if (na .eq. 0) return
      do 117 i=1,n
         c(i) = ch(i)
  117 continue
c
      return
      end
