# Supplementary material for: Improved double Fourier series on a sphere and its application to a semi-implicit semi-Lagrangian shallow-water model
Source: Copernicus journal article supplement (doi:10.5194/gmd-15-2561-2022), 2022-03-28
Supplement: Supplementary file 2 [file gmd-15-2561-2022-supplement.zip › Supplement_Yoshimura/Source_code/bihar/drfti1.f]

      subroutine drfti1 (n,wa,ifac)
      double precision wa(1), arg, argh, argld, fi, tpi
      integer ifac(1), ntryh(4)
      data ntryh(1), ntryh(2), ntryh(3), ntryh(4) /4, 2, 3, 5/
      data tpi   /  6.2831853071 7958647692 5286766559 00577d0/
c
      nl = n
      nf = 0
      j = 0
c
  101 j = j+1
      if (j.le.4) ntry = ntryh(j)
      if (j.gt.4) ntry = ntry + 2
  104 nq = nl/ntry
      nr = nl-ntry*nq
      if (nr.ne.0) go to 101
c
  105 nf = nf+1
      ifac(nf+2) = ntry
      nl = nq
      if (ntry .ne. 2) go to 107
      if (nf .eq. 1) go to 107
      do 106 i=2,nf
         ib = nf-i+2
         ifac(ib+2) = ifac(ib+1)
  106 continue
      ifac(3) = 2
  107 if (nl .ne. 1) go to 104
      ifac(1) = n
      ifac(2) = nf
c
      argh = tpi/dfloat(n)
      is = 0
      nfm1 = nf-1
      l1 = 1
      if (nfm1 .eq. 0) return
      do 110 k1=1,nfm1
         ip = ifac(k1+2)
         ld = 0
         l2 = l1*ip
         ido = n/l2
         ipm = ip-1
         do 109 j=1,ipm
            ld = ld+l1
            i = is
            argld = dfloat(ld)*argh
            fi = 0.d0
            do 108 ii=3,ido,2
               i = i+2
               fi = fi+1.d0
               arg = fi*argld
               wa(i-1) = dcos(arg)
               wa(i) = dsin(arg)
  108       continue
            is = is+ido
  109    continue
c
         l1 = l2
  110 continue
c
      return
      end
