# Supplementary material for: Improved double Fourier series on a sphere and its application to a semi-implicit semi-Lagrangian shallow-water model
Source: Copernicus journal article supplement (doi:10.5194/gmd-15-2561-2022), 2022-03-28
Supplement: Supplementary file 2 [file gmd-15-2561-2022-supplement.zip › Supplement_Yoshimura/Source_code/bihar/dsinqf.f]

      subroutine dsinqf (n,x,wsave)
      double precision x(1), wsave(1), xhold
c
      if (n .eq. 1) return
c
      ns2 = n/2
      do 101 k=1,ns2
         kc = n-k
         xhold = x(k)
         x(k) = x(kc+1)
         x(kc+1) = xhold
  101 continue
c
      call dcosqf (n,x,wsave)
c
      do 102 k=2,n,2
         x(k) = -x(k)
  102 continue
c
      return
      end
