# Supplementary material for: Improved double Fourier series on a sphere and its application to a semi-implicit semi-Lagrangian shallow-water model
Source: Copernicus journal article supplement (doi:10.5194/gmd-15-2561-2022), 2022-03-28
Supplement: Supplementary file 2 [file gmd-15-2561-2022-supplement.zip › Supplement_Yoshimura/Source_code/bihar/dsint.f]

      subroutine dsint (n,x,wsave)
      double precision x(1), wsave(1), sqrt3, t1, t2, x1, xh, xim1
      data sqrt3 /  1.7320508075 6887729352 7446341505 87237d0/
c
      if (n-2) 101,102,103
  101 x(1) = x(1)+x(1)
      return
c
  102 xh = sqrt3*(x(1)+x(2))
      x(2) = sqrt3*(x(1)-x(2))
      x(1) = xh
      return
c
  103 np1 = n+1
      ns2 = n/2
      x1 = x(1)
      x(1) = 0.d0
      do 104 k=1,ns2
         kc = np1-k
         t1 = x1-x(kc)
         t2 = wsave(k)*(x1+x(kc))
         x1 = x(k+1)
         x(k+1) = t1+t2
         x(kc+1) = t2-t1
  104 continue
      modn = mod(n,2)
      if (modn .ne. 0) x(ns2+2) = 4.d0*x1
c
      call drfftf (np1,x,wsave(ns2+1))
c
      x(1) = .5d0*x(1)
      do 105 i=3,n,2
         xim1 = x(i-1)
         x(i-1) = -x(i)
         x(i) = x(i-2)+xim1
  105 continue
      if (modn.eq.0) x(n) = -x(n+1)
c
      return
      end
