# Supplementary material for: Improved double Fourier series on a sphere and its application to a semi-implicit semi-Lagrangian shallow-water model
Source: Copernicus journal article supplement (doi:10.5194/gmd-15-2561-2022), 2022-03-28
Supplement: Supplementary file 2 [file gmd-15-2561-2022-supplement.zip › Supplement_Yoshimura/Source_code/shallow_water_DFS/gmean_to_zero_dfs.F90]

module gmean_to_zero_dfs

  use com_dfs,only : MMAX,NNUM

  implicit none

  public :: gmean_to_zero_dfs__run

contains

  subroutine gmean_to_zero_dfs__run(qdata) !INOUT
    !
    complex(8),intent(INOUT) :: qdata(0:NNUM-1,0:MMAX)
    complex(8) :: w
    integer :: n
    !
    w = 0.0d0
    do n=2,NNUM-1,2
       w = w - qdata(n,0)/(1.0d0-n*n)
    end do
    qdata(0,0) = w
    !
  end subroutine gmean_to_zero_dfs__run

end module gmean_to_zero_dfs
