# Supplementary material for: Improved double Fourier series on a sphere and its application to a semi-implicit semi-Lagrangian shallow-water model
Source: Copernicus journal article supplement (doi:10.5194/gmd-15-2561-2022), 2022-03-28
Supplement: Supplementary file 2 [file gmd-15-2561-2022-supplement.zip › Supplement_Yoshimura/Source_code/shallow_water_DFS/hdiff4_dfs.F90]

module hdiff4_dfs

  use com_dfs, only : MMAX, NNUM
  use helmholtz_dfs_cmplx, only : helmholtz_dfs_cmplx__run1, helmholtz_dfs_cmplx__run2

  implicit none

  private
  public :: hdiff4_dfs__run

contains

  subroutine hdiff4_dfs__run  &!biharmonic spectral filter
   &( delt, gamma,           &!IN
   &  qvar         )          !INOUT
    !
    real(8),intent(in) :: delt
    real(8),intent(in) :: gamma
    complex(8),intent(inout) :: qvar(NNUM,0:MMAX)
    !
    complex(8) :: gamma1
    complex(8) :: gamma2
    !
    gamma1 = cmplx( 0.0d0, -sqrt(gamma), kind=8 )
    gamma2 = cmplx( 0.0d0, sqrt(gamma), kind=8 )
    !
    call helmholtz_dfs_cmplx__run1     &!
     &( delt, gamma1,          &!IN
     &  qvar        )           !INOUT
    !
    call helmholtz_dfs_cmplx__run2     &!
     &( delt, gamma2,          &!IN
     &  qvar        )           !INOUT
    !
  end subroutine hdiff4_dfs__run

end module hdiff4_dfs
