# Supplementary material for: Improved double Fourier series on a sphere and its application to a semi-implicit semi-Lagrangian shallow-water model
Source: Copernicus journal article supplement (doi:10.5194/gmd-15-2561-2022), 2022-03-28
Supplement: Supplementary file 2 [file gmd-15-2561-2022-supplement.zip › Supplement_Yoshimura/Source_code/shallow_water_DFS/prm_phconst.F90]

module prm_phconst

  real(8),parameter :: ER = 6.37122d6     !! Radius of the Earth [m]
  real(8),parameter :: ER_INV = 1.0d0/ER
  
  real(8),parameter :: PI = 3.1415926535897932d0
  real(8),parameter :: PI2 = 2.0d0*PI
  real(8),parameter :: OMG = 7.292d-5     !! Angular velocity of the earth’s rotation [/s]
  real(8),parameter :: GRAV = 9.80616d0   !! Gravity acceleration [m/s**2]
  
end module prm_phconst
