# Supplementary material for: Improved double Fourier series on a sphere and its application to a semi-implicit semi-Lagrangian shallow-water model
Source: Copernicus journal article supplement (doi:10.5194/gmd-15-2561-2022), 2022-03-28
Supplement: Supplementary file 2 [file gmd-15-2561-2022-supplement.zip › Supplement_Yoshimura/Source_code/shallow_water_DFS/test.sh]

#!/bin/bash

#PJM -g M101
#PJM -L rscgrp=cxm
###PJM -L rscgrp=dbg
#PJM -L vnode=1
#PJM -L vnode-core=40
#PJM -L vnode-mem=160Gi
###PJM -L vnode-mem=320Gi
#PJM -L elapse=00:01:00
#PJM -s
###PJM -j
###PJM -P exec-policy=simplex

export OMP_NUM_THREADS=40

#export OMP_STACKSIZE=1024m
export OMP_STACKSIZE=16000m

./test
