# Supplementary material for: Improved double Fourier series on a sphere and its application to a semi-implicit semi-Lagrangian shallow-water model
Source: Copernicus journal article supplement (doi:10.5194/gmd-15-2561-2022), 2022-03-28
Supplement: Supplementary file 2 [file gmd-15-2561-2022-supplement.zip › Supplement_Yoshimura/Source_code/shallow_water_DFS/test_ninediagonal.F90]

program test_ninediagonal

  use ninediagonal, only : ninediagonal__test
!  use ninediagonal_4, only : ninediagonal_4__test

  implicit none
  
  call ninediagonal__test
!  call ninediagonal_4__test

end program test_ninediagonal
