# Supplementary material for: Improved double Fourier series on a sphere and its application to a semi-implicit semi-Lagrangian shallow-water model
Source: Copernicus journal article supplement (doi:10.5194/gmd-15-2561-2022), 2022-03-28
Supplement: Supplementary file 2 [file gmd-15-2561-2022-supplement.zip › Supplement_Yoshimura/Source_code/shallow_water_DFS/test_pentadiagonal.F90]

program test_pentadiagonal

!  use pentadiagonal, only : pentadiagonal__test
!  use pentadiagonal_4, only : pentadiagonal_4__test
  use pentadiagonal_cmplx, only : pentadiagonal_cmplx__test

  implicit none
  
!  call pentadiagonal__test
!  call pentadiagonal_4__test
  call pentadiagonal_cmplx__test

end program test_pentadiagonal
