# Supplementary material for: Improved double Fourier series on a sphere and its application to a semi-implicit semi-Lagrangian shallow-water model
Source: Copernicus journal article supplement (doi:10.5194/gmd-15-2561-2022), 2022-03-28
Supplement: Supplementary file 2 [file gmd-15-2561-2022-supplement.zip › Supplement_Yoshimura/Source_code/shallow_water_DFS/test_tridiagonal.F90]

program test_tridiagonal

  use tridiagonal, only : tridiagonal__test
!  use tridiagonal_cmplx, only : tridiagonal_cmplx__test

  implicit none
  
  call tridiagonal__test
!  call tridiagonal_cmplx__test

end program test_tridiagonal
