# Supplementary material for: Improved double Fourier series on a sphere and its application to a semi-implicit semi-Lagrangian shallow-water model
Source: Copernicus journal article supplement (doi:10.5194/gmd-15-2561-2022), 2022-03-28
Supplement: Supplementary file 2 [file gmd-15-2561-2022-supplement.zip › Supplement_Yoshimura/Source_code/shallow_water_SH/test_truncate.F90]

program test_truncate

  !! Shallow water model using spherical harmonics

  use prm_phconst, only : PI, PI2, ER, OMG, GRAV
  use legendre, only : legendre__ini, legendre__g2w_uv, legendre__g2w,  &
   &                   legendre__w2g_uv, legendre__w2g_dy, legendre__w2g
  use fft, only : fft_run_towave, fft_run_togrid
  use uv2rotdiv, only : uv2rotdiv_run
  use rotdiv2uv, only : rotdiv2uv_run
  use xderiv, only : xderiv_run
  use monit, only : monit__ini, monit__output
  use monit_spectrum, only : monit_spectrum__ini, monit_spectrum__output
  use monit_norm, only : monit_norm__ini, monit_norm__output
  use grads, only : grads__outxy
  use e_time, only : e_time__start, e_time__end, e_time__output
!
  implicit none

!  integer,parameter :: IMAX = 16
!  integer,parameter :: JMAX = 8 + jcn_grid
!  integer,parameter :: NMAX = 6
!
  integer,parameter :: IMAX = 128            !! About 300km resolution
  integer,parameter :: JMAX = 64             !! J is from North to South
!  integer,parameter :: NMAX = 62             !! Linear grid
  integer,parameter :: NMAX = 42            !! Quadric grid
!
!  integer,parameter :: IMAX = 160            !! 250km resolution
!  integer,parameter :: JMAX = 80             !! J is from North to South
!  integer,parameter :: NMAX = 78             !! Linear grid
!  integer,parameter :: NMAX = 53             !! Quadric grid
!
!  integer,parameter :: IMAX = 320            !! 120km resolution
!  integer,parameter :: JMAX = 160            !! J is from North to South
!  integer,parameter :: NMAX = 158            !! Linear grid
!  integer,parameter :: NMAX = 106            !! Quadric grid
!
!  integer,parameter :: IMAX = 640            !! 60km resolution
!  integer,parameter :: JMAX = 320            !! J is from North to South
!  integer,parameter :: NMAX = 318            !! Linear grid
!  integer,parameter :: NMAX = 213            !! Quadric grid
!
!  integer,parameter :: IMAX = 1920           !! 20km resolution
!  integer,parameter :: JMAX = 960            !! J is from North to South
!  integer,parameter :: NMAX = 958            !! Linear grid
!  integer,parameter :: NMAX = 639            !! Quadric grid
!
!  integer,parameter :: IMAX = 3840           !! 10km resolution
!  integer,parameter :: JMAX = 1920           !! J is from North to South
!  integer,parameter :: NMAX = 1918           !! Linear grid
!  integer,parameter :: NMAX = 1279           !! Quadric grid
!  integer,parameter :: NMAX = 959            !! Cubic grid
!
!  integer,parameter :: IMAX = 7680           !! 5km resolution
!  integer,parameter :: JMAX = 3840           !! J is from North to South
!  integer,parameter :: NMAX = 3838           !! Linear grid
!  integer,parameter :: NMAX = 2559           !! Quadric grid
!  integer,parameter :: NMAX = 1919           !! Cubic grid
!
!  integer,parameter :: IMAX = 15360          !! 2.6km resolution
!  integer,parameter :: JMAX = 7680           !! J is from North to South
!  integer,parameter :: NMAX = 7678           !! Linear grid
!  integer,parameter :: NMAX = 5119           !! Quadric grid
!  integer,parameter :: NMAX = 3839           !! Cubic grid
!
!  integer,parameter :: IMAX = 20480          !! 2.0km resolution
!  integer,parameter :: JMAX = 10240          !! J is from North to South
!  integer,parameter :: NMAX = 10238          !! Linear grid
!  integer,parameter :: NMAX = 6826           !! Quadric grid
!  integer,parameter :: NMAX = 5119           !! Cubic grid
!
!  integer,parameter :: IMAX = 30720          !! 1.3km resolution
!  integer,parameter :: JMAX = 15360          !! J is from North to South
!  integer,parameter :: NMAX = 15358          !! Linear grid   
!  integer,parameter :: NMAX = 10239          !! Quadric grid
!  integer,parameter :: NMAX = 7679           !! Cubic grid

!  integer,parameter :: IVECLEN = 14  !! For test
  integer,parameter :: IVECLEN = min(IMAX,512)     !! For scalar machine
  integer,parameter :: NDIV = (IMAX-1)/IVECLEN + 1 !! For scalar machine
  
!  integer,parameter :: NDIV = 1                    !! For vector machine
!  integer,parameter :: IVECLEN = (IMAX-1)/NDIV + 1 !! For vector machine

  integer,parameter :: MMAX = NMAX      !! MMAX <= NMAX

  integer,parameter :: NNUM = NMAX+1
  integer,parameter :: MNUM = MMAX+1
  integer,save :: MNWAV
  integer,save :: MNWAV_UV
!
  integer,parameter :: IMAX2=IMAX/2 !! IMAX must be even.
!
  integer,parameter :: MGN_X = 15
  integer,parameter :: MGN_Y = 15
!
  real(8),parameter :: DLON = PI2/IMAX
!
  integer,save :: MNSTART(0:MMAX+1)
  integer,save :: MNSTART_UV(0:MMAX+1)
  
  real(8),save :: WGAUSS(7)
  real(8),save :: XGAUSS(7)
!
  real(8),save :: ALON(IMAX)
  real(8),save :: ALON1(IMAX)
  real(8),save :: SINLON(IMAX)
  real(8),save :: COSLON(IMAX)
  real(8),save :: ALAT(JMAX)
  real(8),save :: ALAT_SL(-6:JMAX+7)   !! latitude for semi-Lagrangian
  real(8),save :: YLAT(JMAX)
  real(8),save :: COSLAT(JMAX)
  real(8),save :: COSLAT_INV(JMAX)
  real(8),save :: SINLAT(JMAX)
!
  real(8),save :: ACOSLAT_INV(JMAX)
  real(8),save :: ACOS2LAT_INV(JMAX)
!
  real(8),save :: GW(JMAX)
!
  real(8),save,allocatable :: ERFNN1(:)
  integer,save,allocatable :: NTOTAL(:)
!
! -----------------------------------------------------------------
!
  call e_time__start(1,"shallow water")

  call initialize
!
  call main
!
  call e_time__end(1,"shallow water")
  call e_time__output
!
!******************************************************************
contains
!******************************************************************

subroutine initialize
!
  integer :: i,j
  integer :: m, mn
  real(8) :: an
!
! -----------------------------------------------------------------------------
!
!
  call legendre__ini                          &
   &( IMAX, JMAX, NNUM, MNUM,                 &!IN
   &  MNWAV, MNWAV_UV, MNSTART, MNSTART_UV,   &!OUT
   &  gw, alat, sinlat, coslat, coslat_inv )   !OUT
!
!$OMP PARALLEL default(SHARED), private(i,j)
 !$OMP DO schedule(STATIC)
  do i=1,IMAX
     ALON(i) = DLON*(i-1)    !## 0 <= alon < 2*PI
     if ( ALON(i) >= PI ) then
        ALON1(i) = ALON(i)-2*PI  !## -PI <= alon1 < PI
     else
        ALON1(i) = ALON(i)       !## -PI <= alon1 < PI
     end if
     SINLON(i) = sin(ALON(i))
     COSLON(i) = cos(ALON(i))
  end do
 !$OMP END DO
 !$OMP DO schedule(STATIC)
  do j=1,JMAX
     ACOSLAT_INV(j) = COSLAT_INV(j)/ER
     ACOS2LAT_INV(j) = COSLAT_INV(j)*COSLAT_INV(j)/ER
     ALAT_SL(j) = ALAT(j)
     YLAT(j) = ALAT(j)*180.0d0/PI
  end do
 !$OMP END DO
!$OMP END PARALLEL
!
  ALAT_SL(0)      = PI/2.0d0
  ALAT_SL(JMAX+1) = -PI/2.0d0
  do j=1,6
    ALAT_SL(-j) = ALAT_SL(0) + ( ALAT_SL(0)-ALAT_SL(j) )
    ALAT_SL(JMAX+1+j) = -ALAT_SL(-j)
  end do
!
!  write(6,*) 'lat='
!  write(6,'(5F10.3)') -alat*180.0d0/PI
  
  allocate( NTOTAL(MNWAV) )
  allocate( ERFNN1(MNWAV) )

!$OMP PARALLEL default(SHARED), private(m,mn,an)
 !$OMP DO schedule(DYNAMIC)
  do m=0,MMAX
    do mn=MNSTART(m),MNSTART(m+1)-1
      NTOTAL(mn) = m + mn - MNSTART(m)
      an = NTOTAL(mn)
      ERFNN1(mn) = an*(an+1.0d0)/(ER*ER)  !## n(n+1)/(a*a)
    end do
  end do
 !$OMP END DO
!$OMP END PARALLEL
!
  XGAUSS(1) = -0.94910791234275852453d0
  XGAUSS(2) = -0.74153118559939443986d0
  XGAUSS(3) = -0.40584515137739716691d0
  XGAUSS(4) =  0.0d0
  XGAUSS(5) =  0.40584515137739716691d0
  XGAUSS(6) =  0.74153118559939443986d0
  XGAUSS(7) =  0.94910791234275852453d0

  WGAUSS(1) = 0.1294849661688696932d0
  WGAUSS(2) = 0.27970539148927666793d0
  WGAUSS(3) = 0.38183005050511894494d0
  WGAUSS(4) = 0.41795918367346938776d0
  WGAUSS(5) = 0.38183005050511894494d0
  WGAUSS(6) = 0.27970539148927666793d0
  WGAUSS(7) = 0.1294849661688696932d0

end subroutine initialize


!&&&&&&&&&&&&&&&&&&&&&&&&&&&&&&&&&&&&&&&&&&&&&&&&&&&&&&&&&&&&&&&&&&&&


subroutine main
!
  real(8) :: qdata(2,mnwav)
  real(8) :: data(imax, jmax)
  real(8) :: data_m(0:mmax, jmax)
  integer :: m,i,j,n
!

  data=0.0d0
  do j=1,jmax
    if ( ylat(j) >= 30.0d0 ) then
      data(:,j)=1.0d0
      data_m(:,j)=1.0d0
    else
      data(:,j)=0.0d0
      data_m(:,j)=0.0d0
    end if
  end do
  
  call grads__outxy( "legendre_initial", 1, MMAX+1, JMAX, ylat, data_m ) !IN

  call legendre__g2w  &
   &( data,           &!IN
   &  qdata   )        !OUT
  call legendre__w2g  &
   &( qdata,          &!IN
   &  data    )        !OUT
     
  
  do j=1,jmax
    do m=0,mmax
      i=m*2+1
      data_m(m,j) = data(i,j)
    end do
  end do
  call grads__outxy( "legendre", 1, MMAX+1, JMAX, ylat, data_m ) !IN
!
end subroutine main


!&&&&&&&&&&&&&&&&&&&&&&&&&&&&&&&&&&&&&&&&&&&&&&&&&&&&&&&&&&&&&&&&&&&&&&&&&&&&&&&&&&&


end program test_truncate
