# Supplementary material for: Improved double Fourier series on a sphere and its application to a semi-implicit semi-Lagrangian shallow-water model
Source: Copernicus journal article supplement (doi:10.5194/gmd-15-2561-2022), 2022-03-28
Supplement: Supplementary file 2 [file gmd-15-2561-2022-supplement.zip › Supplement_Yoshimura/Source_code/shallow_water_SH/xderiv.F90]

module xderiv
!
  use e_time, only : e_time__start, e_time__end
  
  implicit none
!
!**************************************************************
contains
!**************************************************************

subroutine xderiv_run         &
 &( imax, jblk2, mnum, &!IN
 &  gd  ,                     &!IN
 &  gdx           )            !OUT
!----------------------------------------------------------
  integer,intent(in)  :: imax ,jblk2 ,mnum
  real(8),intent(out) :: gdx(imax,jblk2)
  real(8),intent(in)  :: gd(imax,jblk2)
!
  integer :: imin,j,m
!----------------------------------------------------------

  call e_time__start(35,"xderiv_run")

  imin=2*mnum+1
!$OMP PARALLEL default(SHARED), private(j,m)
 !$OMP DO schedule(STATIC)
  do j=1,jblk2
     do m=1,mnum
        gdx(2*m-1,j)=-float(m-1)*gd(2*m  ,j)
        gdx(2*m  ,j)= float(m-1)*gd(2*m-1,j)
     end do
     do m=imin,imax
        gdx(m,j)=0.d0
     end do
  end do
 !$OMP END DO
!$OMP END PARALLEL

  call e_time__end(35,"xderiv_run")
!
end subroutine xderiv_run

!**************************************************************

end module xderiv
